# Supplementary material for: Ultrasensitive SERS immunoassay based on diatom biosilica for detection of interleukins in blood plasma
Source: PubMed Central journal article supplement (PMC5641273; doi:10.1007/s00216-017-0566-5), 2017-08-29
Supplement: 216_2017_566_MOESM1_ESM.pdf [file 216_2017_566_MOESM1_ESM.pdf]

## **Analytical and Bioanalytical Chemistry**

### **Electronic Supplementary Material**

#### **Ultrasensitive SERS immunoassay based on diatom biosilica for detection of interleukins in blood plasma**

Agnieszka Kamińska, M. Sprynsky, Katarzyna Winkler, Tomasz Szyborski

## 1. Synthesis of Au nanoparticles

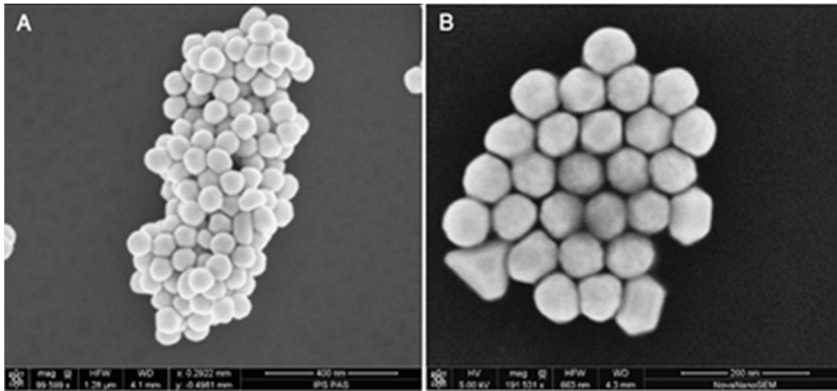

**Fig. S1** The SEM images of Au nanoparticles at different magnifications (AuNPs@CTAB)

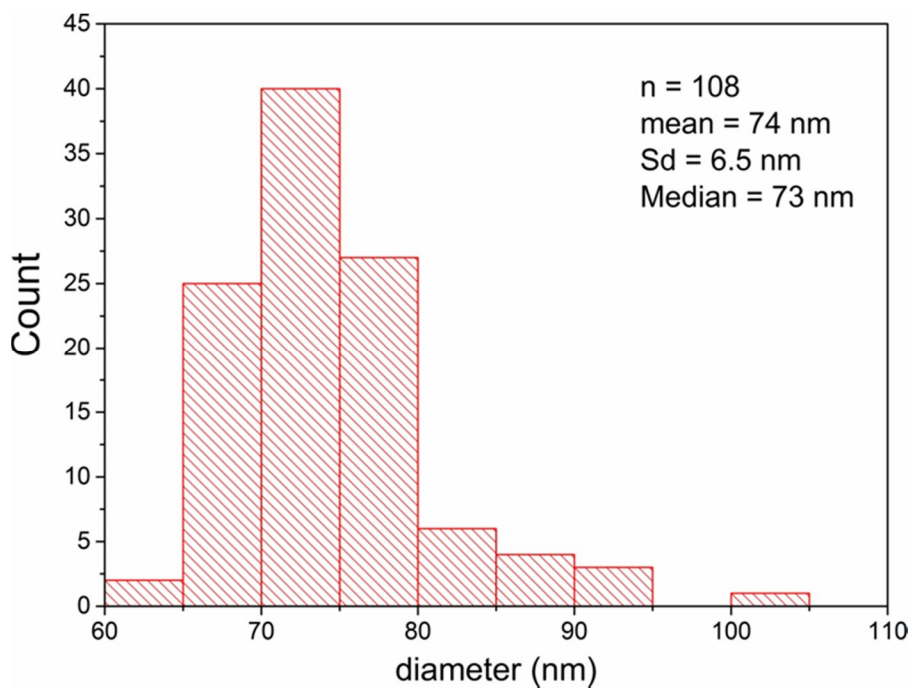

**Fig. S2** Histogram of diameters of Au nanoparticles

## 2. Capturing substrate and Raman reporter-labeled immune-Au nanoparticles characterization

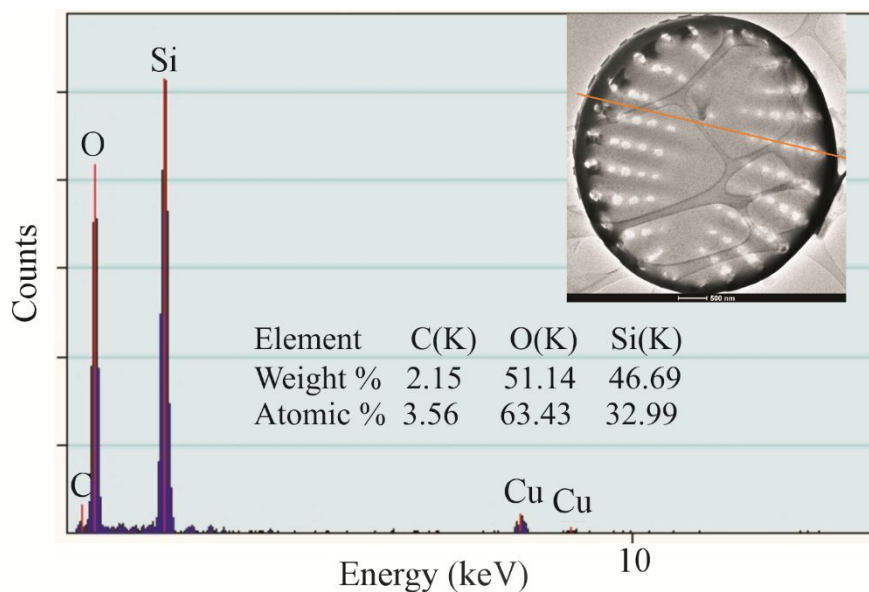

**Fig. S3** TEM-EDX spectrum of elemental composition of the diatom biosilica. The average diameter of gold nanoparticles was about 70 nm according to the SEM images (Figs. S1 and S2)

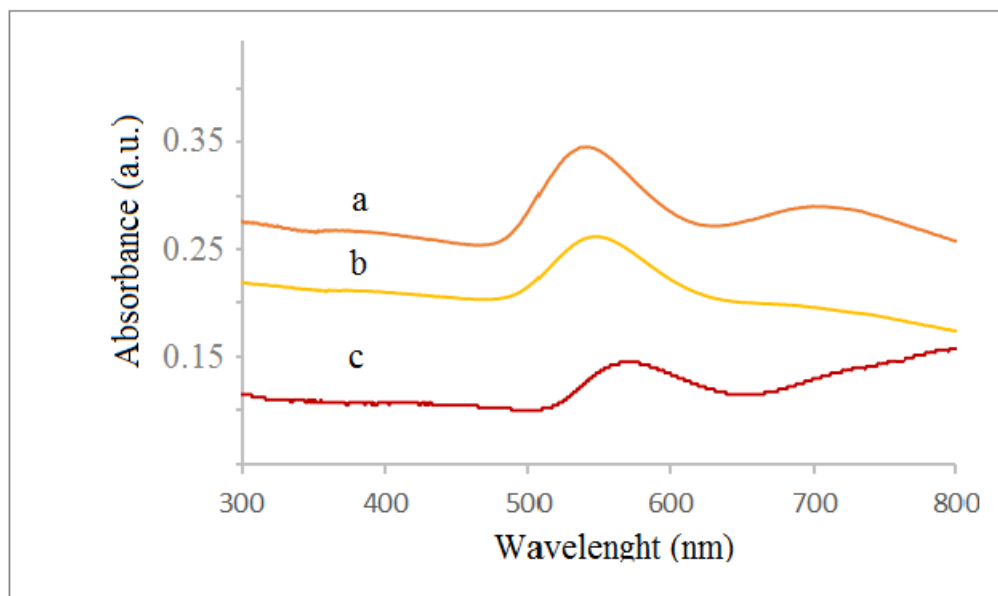

**Fig. S4** The UV-visible extinction spectra of AuNPs at different steps: (a) AuNPs as-received, (b) after modification with Raman reporter (DTNB) and (c) after mixing with antibody

### 3. Capturing substrate and Raman reporter-labeled immune-Au nanoparticles characterization

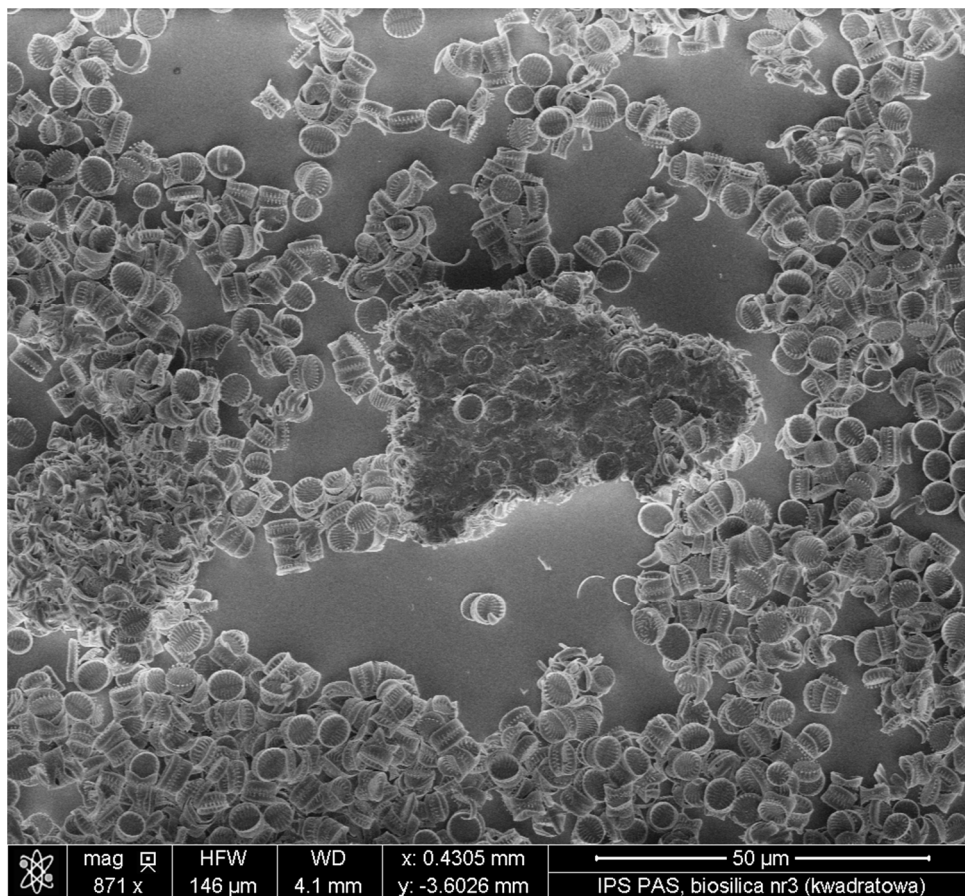

**Fig. S5** SEM picture of SERS platform obtained from 1 ml solution of diatoms

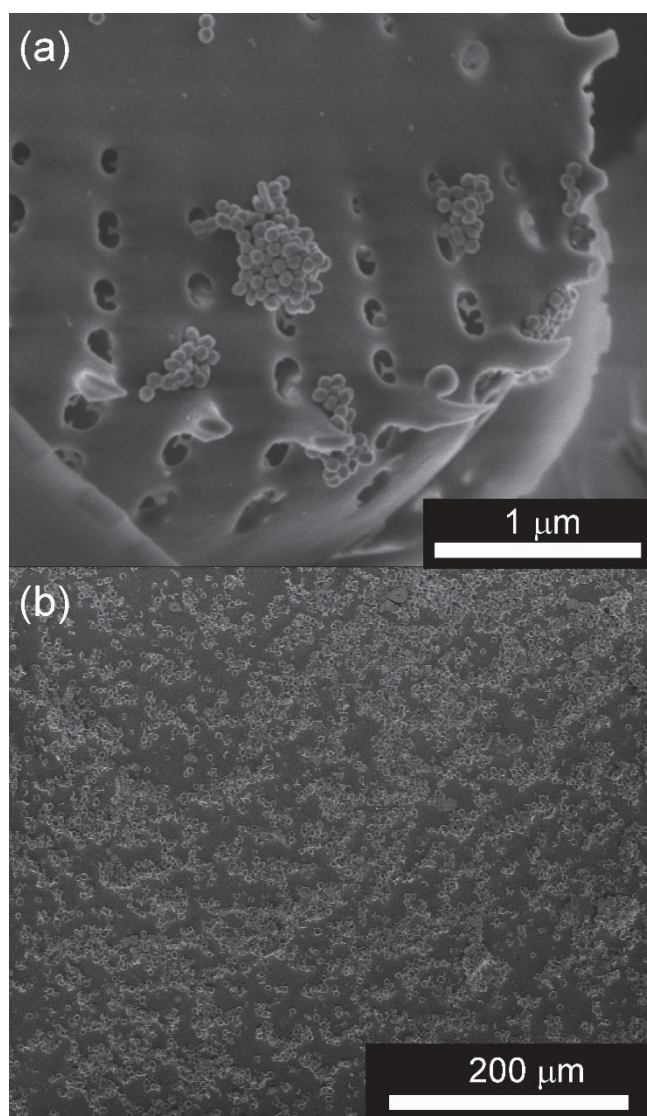

**Fig. S6** (a), (b) SEM images of diatoms-based SERS immunoassay with Raman reporter-labeled immune-Au nanoparticles at different magnifications

#### 4. SERS immuno-sensing

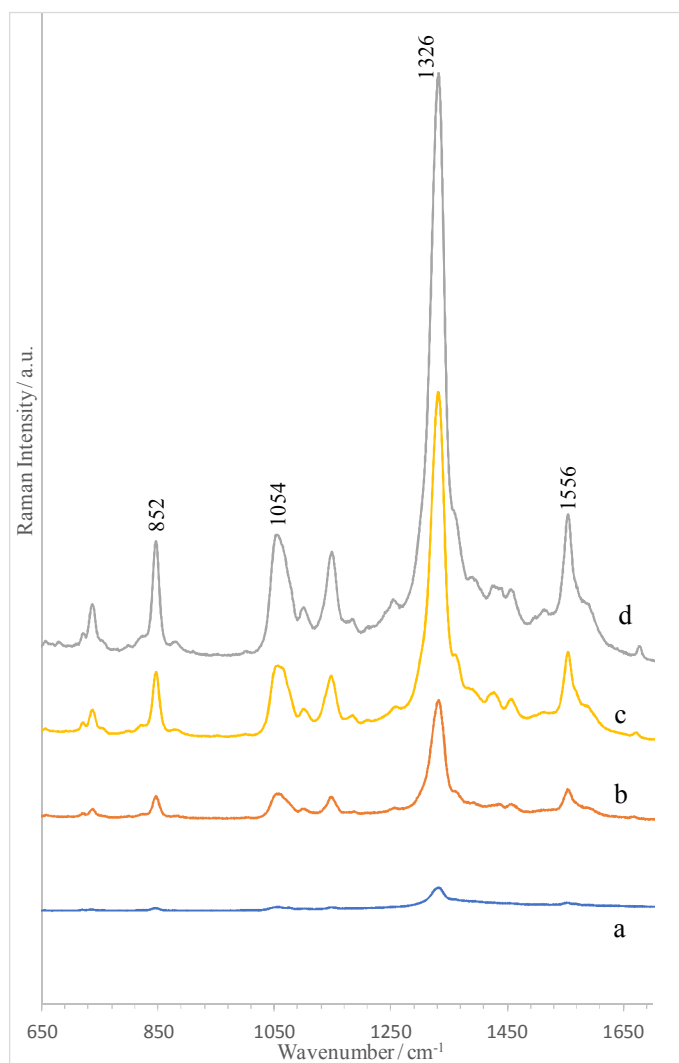

**Fig. S7** (a) SERS spectrum obtained in the control experiment for 20 ng/mL Akt blocking peptide solution in blood plasma; (b, c, and d) SERS spectra in the presence of IL-8, at 5, 10, and 20 ng/mL in blood plasma solutions
